# Supplementary material
Source: PubMed Central journal article supplement (PMC4294779)
Supplement: supp_128.2.373_JCS161513.pdf [file supp_128.2.373_JCS161513.pdf]

Supplementary information for:

**Nuclear Localized FAM21 Participates in NF- $\kappa$ B-Dependent Gene Regulation in Pancreatic Cancer Cells**

Zhi-Hui Deng<sup>1,2</sup>, Timothy S. Gomez<sup>1</sup>, Douglas G. Osborne<sup>1</sup>, Christine A. Phillips-Krawczak<sup>1</sup>, Jin-San Zhang<sup>1,3\*</sup> and Daniel D. Billadeau<sup>1,4\*</sup>

<sup>1</sup> Division of Oncology Research and Schulze Center for Novel Therapeutics, Mayo Clinic College of Medicine, Rochester, MN, USA.

<sup>2</sup> Department of Pathophysiology, Qiqihar Medical University, Qiqihar, China.

<sup>3</sup> Key Laboratory of Biotechnology and Pharmaceutical Engineering, School of Pharmaceutical Sciences, Wenzhou Medical University, Wenzhou, Zhejiang, China.

<sup>4</sup> Department of Immunology, College of Medicine, Mayo Clinic, Rochester, MN 55905, USA

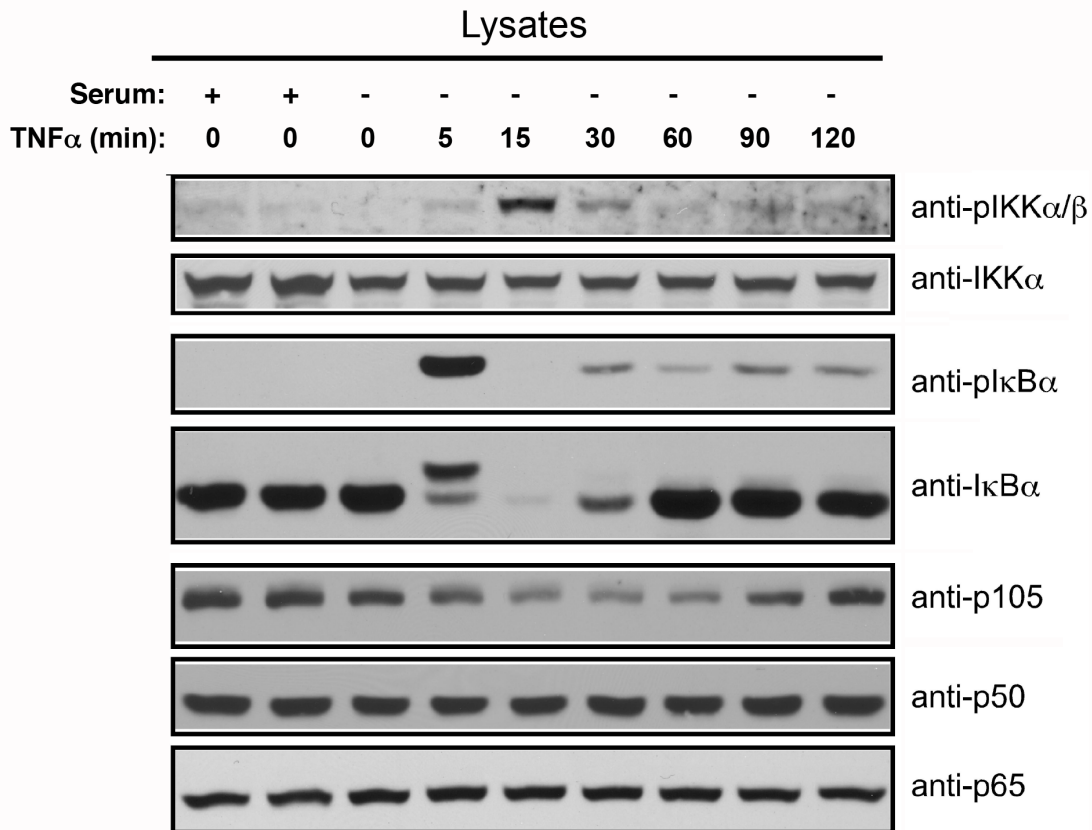

Deng et al. Fig. S1

**Fig.S1. Time kinetics of IKK $\alpha/\beta$  and I $\kappa$ B $\alpha$  phosphorylation and/or degradation following TNF $\alpha$  treatment.**

Whole-cell extracts were from HeLa treated with TNF $\alpha$  for the indicated time points were prepared and subjected to Western blot analysis with indicated antibodies.

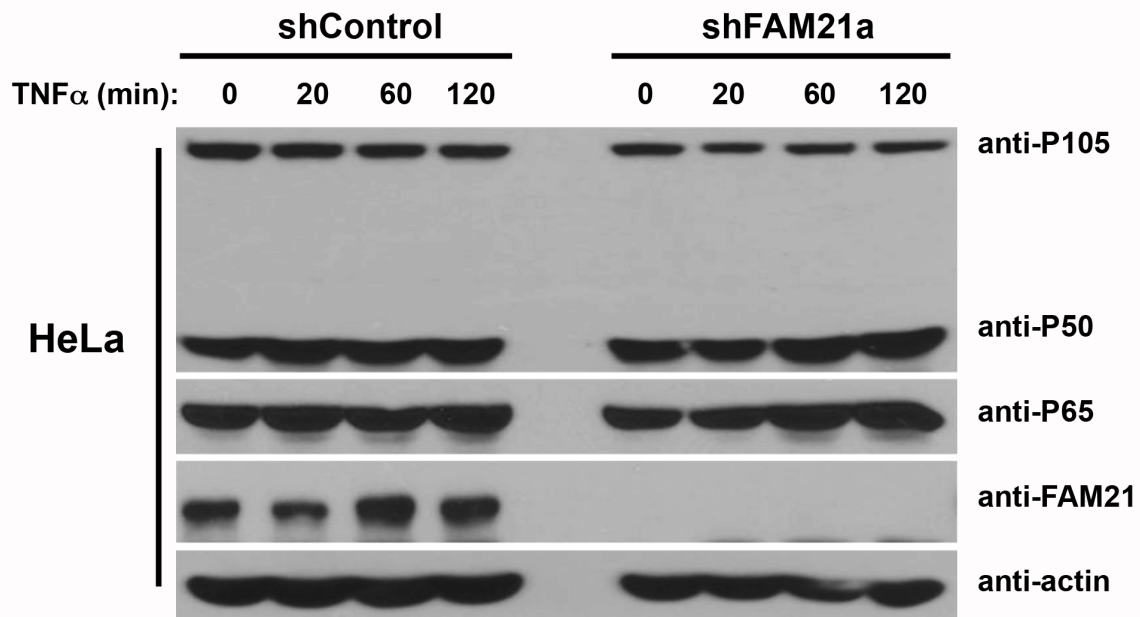

Deng et al. Fig. S2

**Fig. S2. Analysis of cytosolic p65, p50 protein levels in FAM21 knockdown HeLa cells.**

Cytosolic extracts of control and shFAM21 stable HeLa cells treated with TNF $\alpha$  for indicated time points were examined by immunoblot analysis.

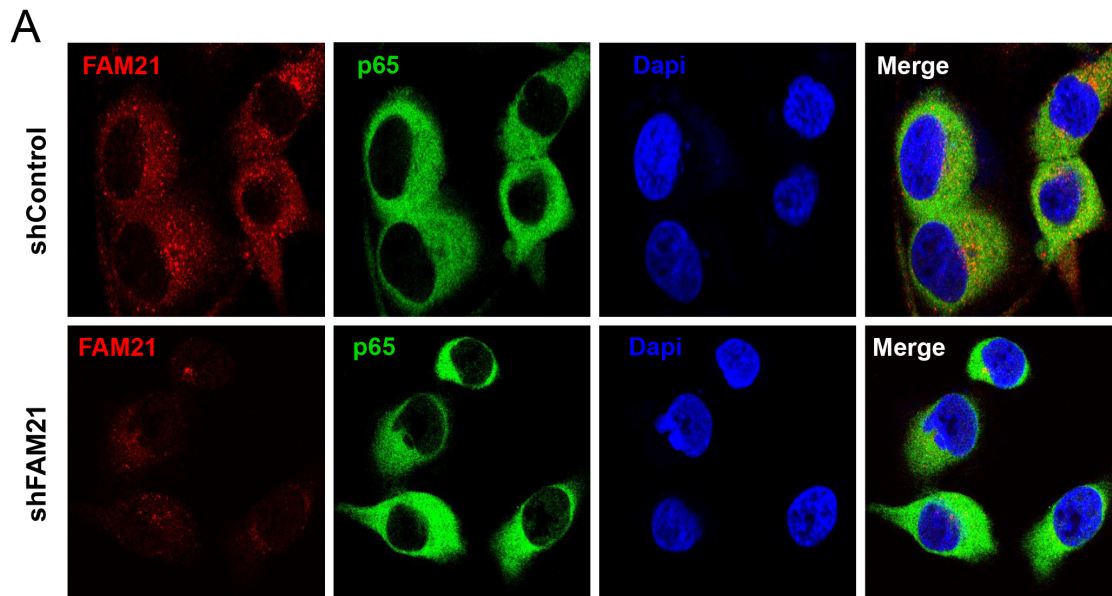

**B**

| Predicted bipartite NLS |      |                                    |       |
|-------------------------|------|------------------------------------|-------|
|                         | Pos. | Sequence                           | Score |
| NLS2                    | 507  | DENKARAEKKVTLSSSKNLKPSSETKTQKG     | 5.7   |
| NLS3                    | 586  | TAAKKQTLCLQAQREEKAKASELSKKKASA     | 6.2   |
| NLS4                    | 657  | EAKAVKKTSLFEEDEEDDLFAIAKDSQKKTQRVS | 6.5   |
| NLS5                    | 888  | FSSAKSQPLVQEKKRVVKKDHSVDSFKNQKHP   | 6.5   |
| NLS6                    | 1191 | KPAKKTNPFPLEDEDDLFTDQKVKKNETKS     | 5.6   |
| NLS7                    | 1279 | EKSKKKVEAKSIFDDDMDDIFSSGIQAKTTKPK  | 6.8   |

Deng et al. Fig. S3

**Fig. S3. FAM21 and p65 Immunofluorescence and bipartite NLS.** A. Immunofluorescent imaging for p65 in scramble control and shFAM21 Panc1 stable cells. B. Additional bipartite NLS sequences in the FAM21 tail domain as predicted by “cNLS Mapper”.

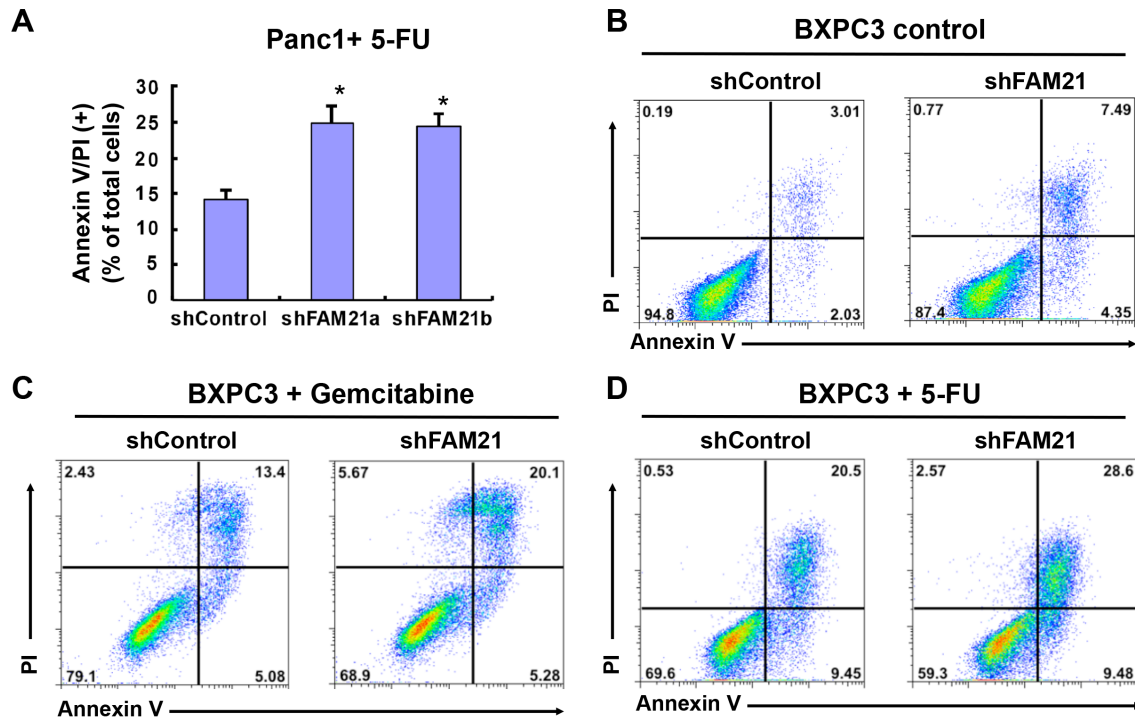

Deng et al. Fig. S4

**Fig.S4. Increased apoptosis in pancreatic cancer cells with FAM21 knockdown in response to drug treatment.**

(A) Panc1 scramble control or shFAM21 stable cells were treated with indicated concentrations of 5-FU for 48 h. Cell apoptosis was determined by annexin V/PI staining and flow cytometry analysis. Results were quantified and shown as mean  $\pm$  SD. \* P-value < 0.05 compared to shControl. (B-D) BXPC3 scramble control and shFAM21 stable cells treated with solvent (B), or 0.25  $\mu$ M gemcitabine (C) or 0.25  $\mu$ g/ml 5-FU (D) for 48 h. Cell apoptosis was determined by flow cytometry following Annexin V/PI staining.

**Table S1. Primers used for qRT-PCR**

| <b>Primers</b> | <b>Sequence (5' – 3')</b> |
|----------------|---------------------------|
| GAPDH-F        | ACATCGCTCAGACACCATG       |
| GAPDH-R        | TGTAGTTGAGGTCAATGAAGGG    |
| A20 -F         | ATCATCCACAAAGCCCTCAT      |
| A20- R         | CCTTCCTCAGTACCAAGTCT      |
| CCL2 -F        | CCTCCAGCATGAAAGTCTCTG     |
| CCL2 -R        | TCTGCACTGAGATCTTCCTATTG   |
| IL-1 -F        | TGTATGTGACTGCCCAAGATG     |
| IL-1 -R        | TTAGTGCCGTGAGTTTCCC       |
| IL-6 -F        | CCACTCACCTCTTCAGAACG      |
| IL-6 -R        | CATCTTTGGAAGGTTTCAGGTTG   |
| SELE -F        | TCCCTCTAGTTCCCAGATG       |
| SELE -R        | AAGCCTTGAATCAGACGGAA      |

**Table S2. Primers used for ChIP-PCR assay**

| <b>Primers</b>    | <b>Sequence (5' – 3')</b> |
|-------------------|---------------------------|
| SELE -F           | AGGCATGGACAAAGGTGA        |
| SELE -R           | GTAAAGAGGAAATCCCCAAT      |
| IL-1a promoter -F | GGCCTCAAGTGATTGTCCTG      |
| IL-1a promoter -R | CAGTTGGAGTTTAAGCCATG      |
| IL-1a intron1 -F  | ATGCTGAATGTGGACTAAG       |
| IL-1a intron1 -R  | AGAACACCAGCCACCATC        |
| IL-6 -F           | AGGTTTCCAATCAGCCCC        |
| IL-6 -R           | AGCCTCAGACATCTCCAGT       |
